# Supplementary material for: An Oligoimide Particle as a Pickering Emulsion Stabilizer
Source: PubMed Central journal article supplement (PMC6403722; doi:10.3390/polym10101071), 2018-09-27
Supplement: polymers-10-01071-s001.pdf [file polymers-10-01071-s001.pdf]

## Supplementary Material

### Oligoimide Particle as a Pickering Emulsion Stabilizer

Yu-Jin Cho <sup>1</sup>, Dong-Min Kim <sup>1</sup>, In-Ho Song <sup>1</sup>, Ju-Young Choi <sup>1</sup>, Seung-Won Jin <sup>1</sup>, Beom-Jun Kim <sup>1</sup>, Jin-Won Jeong <sup>1</sup>, Chae-Eun Jang <sup>1</sup>, Kunmo Chu <sup>2</sup> and Chan-Moon Chung <sup>1,\*</sup>

<sup>1</sup> Department of Chemistry, Yonsei University, Wonju 26493, Korea; chyujn904@naver.com (Y.-J.C.); dmkimr@yonsei.ac.kr (D.-M.K.); segunda@nate.com (I.-H.S.); cjoy0510@yonsei.ac.kr (J.-Y.C.); jinsw0906@yonsei.ac.kr (S.-W.J.); sk754@naver.com (B.-J.K.); jjw9172@naver.com (J.-W.J.); minnie0511@naver.com (C.-E.J.)

<sup>2</sup> Samsung Advanced Institute of Technology, Suwon 16678, Korea; chukunmo@gmail.com

\* Correspondence: cmchung@yonsei.ac.kr; Tel.: +82-33-760-2266

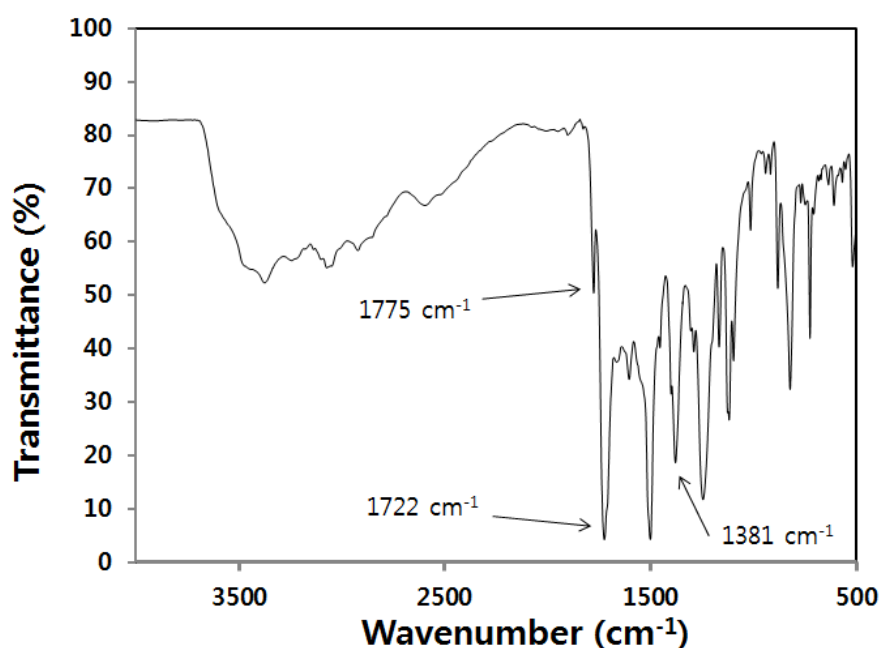

Figure S1. FT-IR spectrum of PMDA-ODA synthesized in NMP.

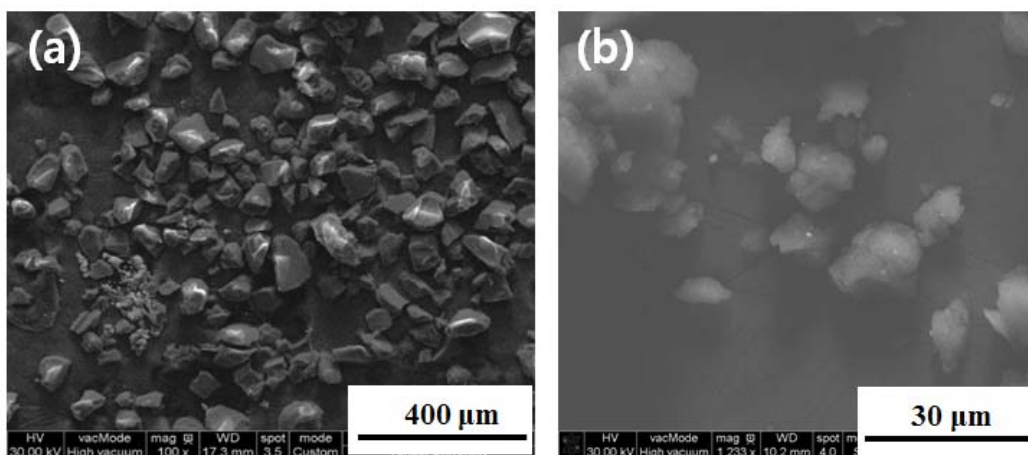

Figure S2. FE-SEM image of PMDA-ODA particles synthesized in NMP: (a) particles prepared by sieving with a 200  $\mu\text{m}$  sieve and ultrasonication of its dispersion at a frequency of 30 kHz for 30 min; (b) particles prepared by ball milling using a planetary ball mill with a speed of 800 rpm for 22 h.

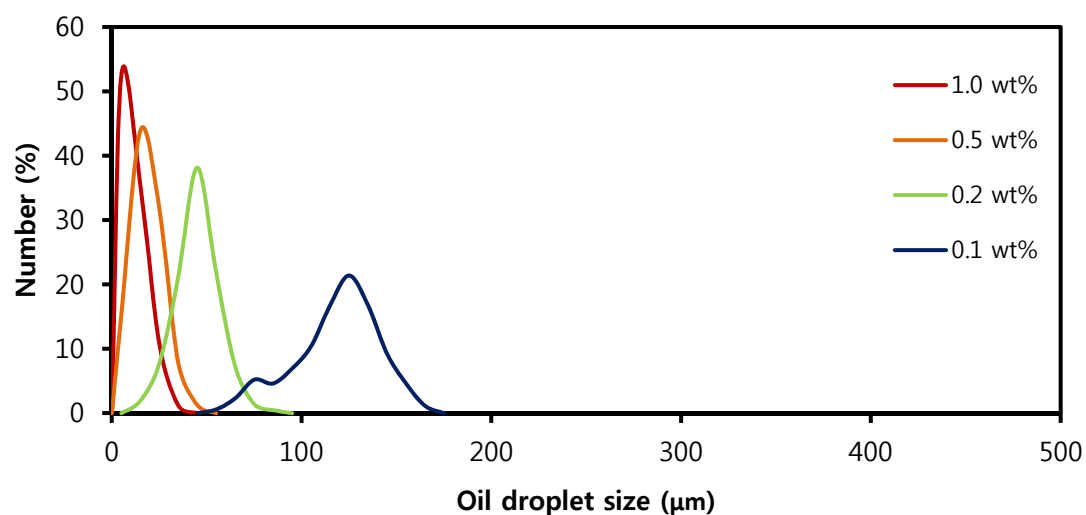

**Figure S3.** Oil droplet size distributions of PMDA-ODA particle-stabilized *n*-hexadecane-in-water emulsions prepared at various particle concentrations (0.1–1.0 wt %).

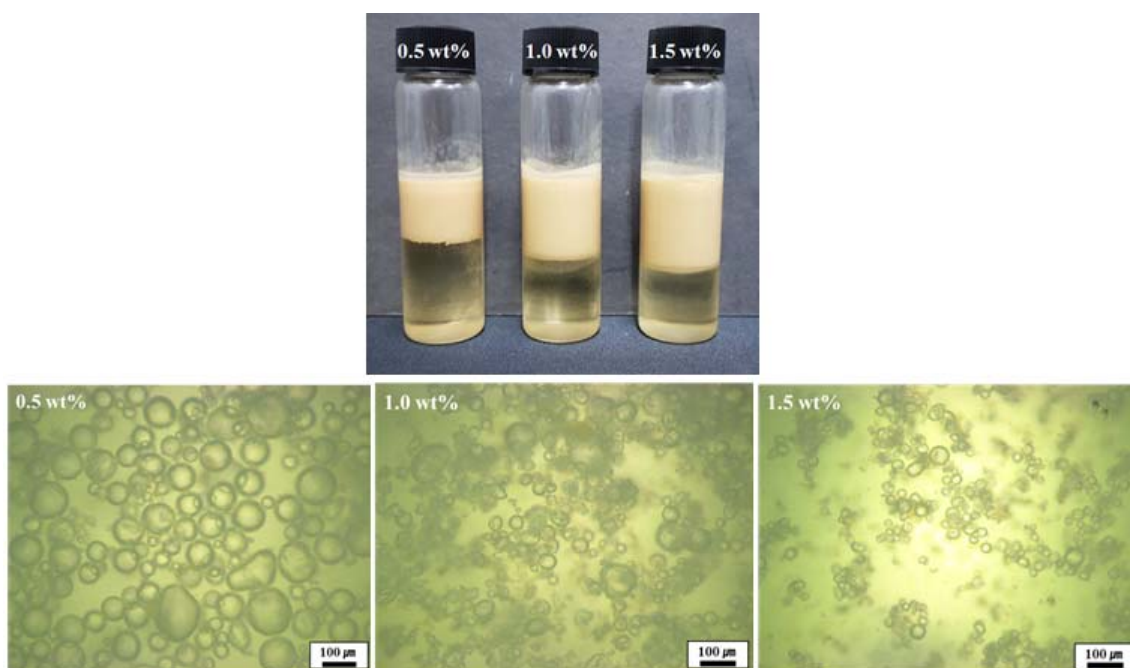

**Figure S4.** A photograph (top) and optical micrographs (bottom) of water-in-phenyl acetate Pickering emulsions prepared with different PMDA-ODA particle concentrations: 0.5, 1.0 and 1.5 wt %.
